# 1 **A conserved role for SFPQ in repression of pathogenic cryptic last exons**

2 Patricia M. Gordon<sup>1,\*</sup>, Fursham Hamid<sup>1</sup>, Eugene V. Makeyev<sup>1</sup>, and Corinne Houart<sup>1</sup>

3

4 <sup>1</sup> Centre for Developmental Neurobiology and MRC Centre for Neurodevelopmental  
5 Disorders, IoPPN, Guy's Campus, King's College London, London SE1 1UL, UK

6 \* Corresponding author

7

## 8 **Abstract**

9 The RNA-binding protein SFPQ plays an important role in neuronal development and  
10 has been associated with several neurodegenerative disorders, including ALS, FTLD, and  
11 Alzheimer's Disease. Here, we report that loss of *sfpq* leads to premature termination of  
12 multiple transcripts due to widespread activation of previously unannotated cryptic last  
13 exons (CLEs). These CLEs appear preferentially in long introns of genes with neuronal  
14 functions and dampen gene expression outputs and/or give rise to short peptides  
15 interfering with the normal gene functions. We show that one such peptide encoded by  
16 the CLE-containing *epha4b* mRNA isoform is responsible for neurodevelopmental  
17 defects in the *sfpq* mutant. The uncovered CLE-repressive activity of SFPQ is conserved  
18 in mouse and human, and SFPQ-inhibited CLEs are found across ALS iPSC-derived  
19 neurons. These results greatly expand our understanding of SFPQ function and uncover  
20 a new gene regulation mechanism with wide relevance to human pathologies.

21

22 **Keywords:** SFPQ, neurodevelopment, zebrafish, alternative polyadenylation, cryptic  
23 exons, ALS, neurodegeneration

24

25

26

## 27 **Introduction**

28       Neurons are highly polarized cells with specialized compartments that must be  
29 able to respond to growth cues as well as to form and modify their synapses in an  
30 activity-dependent manner. Each compartment of a neuron is able to achieve functional  
31 specificity by maintaining a unique proteome (Holt & Schuman, 2013; Hanus &  
32 Schuman, 2013; Cagnetta *et al*, 2018). Protein localization in neurons has been shown  
33 to be driven largely by RNA transportation and local translation (Zappulo *et al*, 2017),  
34 suggesting that neuronally-expressed genes must have special regulatory mechanisms  
35 to ensure proper transcription, localization, and translation of each RNA. Indeed, RNAs  
36 from neuronal tissue are regulated by a complex array of alternative splicing, intron  
37 retention, and alternative cleavage and polyadenylation (Mauger *et al*, 2016;  
38 Traunmüller *et al*, 2016; Furlanis *et al*, 2019; Iijima *et al*, 2019; Taliaferro *et al*, 2016;  
39 Ciolli Mattioli *et al*, 2019; Guvenek & Tian, 2018; Tushev *et al*, 2018).

40       Splicing Factor Proline/Glutamine Rich (SFPQ) is a ubiquitously expressed RNA  
41 binding protein of the DBHS family with diverse roles in alternative splicing,  
42 transcriptional regulation, microRNA targeting, paraspeckle formation, and RNA  
43 transport into axons (Patton *et al*, 1993; Dye & Patton, 2001; Kim *et al*, 2011; Cosker *et*  
44 *al*, 2016; Bottini *et al*, 2017; Mora Gallardo *et al*, 2019; Takeuchi *et al*, 2018; Knott *et al*,  
45 2016). Inactivation of the *sfpq* gene causes early embryonic lethality in mouse and  
46 zebrafish as well as impaired cerebral cortex development, reduced brain boundary  
47 formation, and axon outgrowth defects (Lowery *et al*, 2007; Thomas-Jinu *et al*, 2017;  
48 Takeuchi *et al*, 2018; Saud *et al*, 2017). In humans, *sfpq* mutations have been linked to  
49 neurodegenerative diseases such as Alzheimer's, ALS, and FTD, and SFPQ interacts with

50 the ALS-associated RNA binding proteins TDP-43 and FUS (Ke *et al*, 2012; Wang *et al*,  
51 2015; Ishigaki *et al*, 2017; Luisier *et al*, 2018; Tyzack *et al*, 2019; Lu *et al*, 2018).

52 While SFPQ is known to play a role in alternative splicing, only a few RNA targets  
53 of SFPQ have been identified. Intriguingly, SFPQ has opposing effects on splicing,  
54 depending on the target: it represses inclusion of exon 10 of tau and exon 4 of CD45, but  
55 conversely it promotes inclusion of the N30 exon of non-muscle myosin heavy-chain II-B  
56 (Ray *et al*, 2011; Ishigaki *et al*, 2017; Heyd & Lynch, 2010; Yarosh *et al*, 2015; Kim *et al*,  
57 2011). In addition to its role in splicing, SFPQ has been shown to be part of the 3'-end  
58 processing complex, where it enhances cleavage and polyadenylation at suboptimal  
59 polyadenylation sites (Hall-Pogar *et al*, 2007; Rosonina *et al*, 2005; Shi *et al*, 2009). The  
60 mechanisms by which SFPQ regulates mRNA processing are still unclear, however, and  
61 more work is necessary to understand its contribution to normal and pathological cell  
62 states.

63 To understand the molecular functions of SFPQ in developing neurons, we  
64 performed an RNA-seq analysis of *sfpq* homozygous null mutant zebrafish embryos at  
65 24 hpf, the stage of phenotypic onset. Our results reveal a novel role for the protein: loss  
66 of SFPQ causes premature termination of transcription as a result of previously  
67 unannotated pre-mRNA processing events that we refer to as Cryptic Last Exons (CLEs).  
68 Here we describe the formation of CLEs and show that not only do the truncated  
69 transcripts act as a form of negative regulation of gene expression levels, but they also  
70 directly contribute to the *sfpq* pathology. This function of SFPQ is conserved across  
71 vertebrates and may be implicated in human SFPQ-mediated disease states.

72  
73 **Results**  
74

75 **Identification of the SFPQ-dependent splicing regulation program**

76 To examine the effect of SFPQ on gene expression and RNA splicing, we analyzed  
77 total RNA extracted from 24 hpf *sfpq*<sup>-/-</sup> zebrafish embryos and their heterozygous or  
78 wildtype siblings by RNA sequencing (RNA-seq). Differential gene expression analysis  
79 using Cufflinks RNA-seq workflow (Trapnell *et al*, 2012) uncovered 189 genes that were  
80 upregulated and 1044 genes that were downregulated in the mutant samples by a factor  
81 of at least 1.3-fold with  $q \leq 0.05$  (Figure 1a). These results are consistent with our  
82 previous microarray study, which showed the vast majority of genes with differential  
83 expression in *sfpq*<sup>-/-</sup> embryos as being downregulated (Thomas-Jinu *et al*, 2017). Gene  
84 ontology (GO) analysis of the new dataset, using total transcribed genes as a background  
85 gene set, showed enrichment for neuron-specific terms, including neuronal  
86 differentiation and axon guidance (Tables S1 and S2). Using Cufflinks' differential  
87 isoform switch analysis, we identified 112 genes with significant change in the relative  
88 expressions of splice variants in the mutants ( $q \leq 0.05$ ; Table S3). GO analysis of these  
89 regulated transcripts again showed an over-representation of neuron-specific terms  
90 including axonogenesis, axon guidance, and dendrite formation (Table S4). Surprisingly,  
91 thorough comparison and annotation of these transcripts revealed that 46% of these  
92 genes express a splice variant containing a cryptic alternate last exon, not annotated in  
93 the zebrafish assembly (Figure S1a). To verify this, we analyzed the dataset with  
94 Whippet (Sterne-Weiler *et al*, 2018), a tool that sensitively detects changes in the usage  
95 of alternative exons and additionally allows quantitation of gene expression changes.  
96 Whippet also uncovered a high proportion of downregulated genes in *sfpq*<sup>-/-</sup> embryos  
97 (Figure 1b). More importantly, the analysis confirmed that splicing of alternate last  
98 exons is the most abundant (18.5%) category of SFPQ-regulated splicing events (Figure  
99 1c). Systematic classification of these exons into "known" and "cryptic" events  
100 corroborates that the majority (113 out of 157) of these last exons have not been

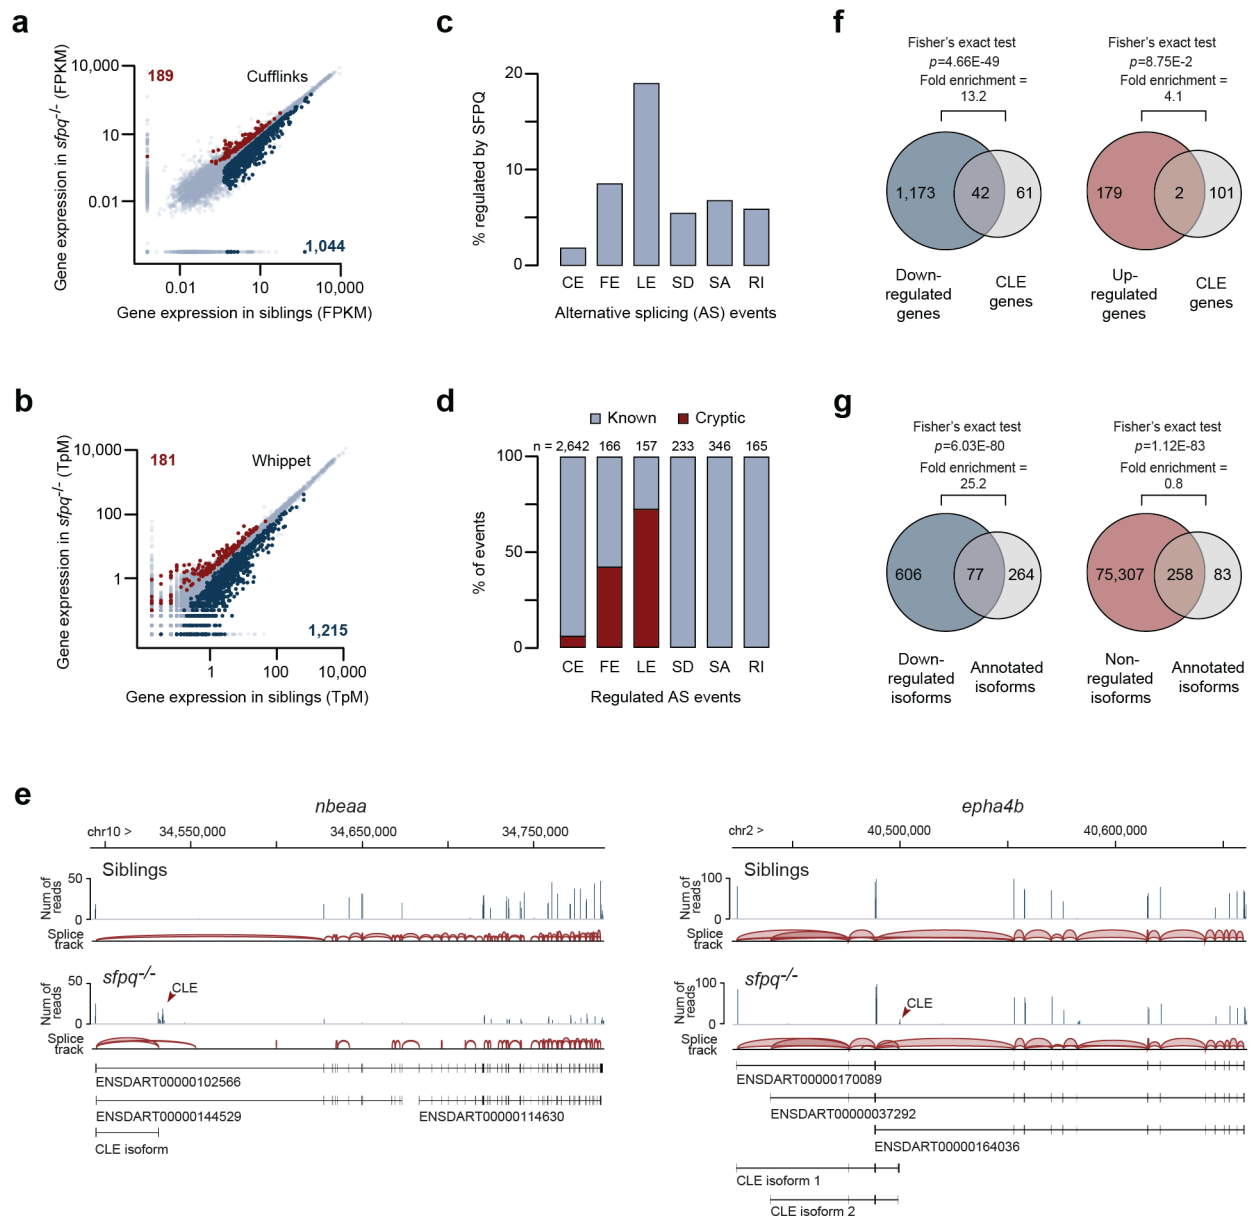

**Fig. 1**

**Figure 1: SFPQ regulates the formation of cryptic last exons (CLEs)**

**a-b**, Scatter plot showing expression values of genes in *sfpq*<sup>-/-</sup> and siblings, analyzed using Cufflinks (a) or Whippet (b) pipelines.

**c**, Alternative last exon splicing is highly regulated by SFPQ. CE: cassette exon, FE: first exon, LE: last exon, SD: splice donor, SA: splice acceptor, RI: retained intron.

**d**, Majority of SFPQ-regulated last exon events are cryptic.

**e**, Sashimi plots showing example CLE formation in *nbeaa* and *epha4b*. Top tracks: plot of read coverage from siblings (upper) and *sfpq*<sup>-/-</sup> (lower). Bottom tracks: isoforms discovered for each gene.

**f**, Genes expressing CLE-containing isoforms tend to be down-regulated in *sfpq*<sup>-/-</sup>.

**g**, Normal long isoforms (annotated isoforms) from CLE-expressing genes tend to be down-regulated in *sfpq*<sup>-/-</sup>.

101 previously annotated (Figure 1D, Table S5). These last exons were expressed from 106  
102 genes, 25 of which were also detected by the Cufflinks pipeline (Figure S1b). We refer to  
103 this pervasive splicing defect, in which the transcript undergoes premature termination  
104 after the inclusion of a cryptic exon, as Cryptic Last Exons (CLEs) (Figure 1e).

105

### 106 **The use of CLEs inversely correlates with expression of full-length transcripts**

107 Of the 106 CLE-expressing genes, 97% exhibited increased splicing of CLEs in  
108 *sfpq*<sup>-/-</sup> (Table S5). Notably, more than half of these genes were downregulated in mutants  
109 (~13 fold enrichment over the number of genes expected by chance; Fisher's exact test  
110  $p=4.66 \times 10^{-49}$ ) indicating concurrent alterations in expression level and splicing for  
111 these genes (Figure 1f). In line with this finding, the full-length (non-CLE) isoforms from  
112 these genes showed an even stronger enrichment for the downregulation effect  
113 (exceeding the expectation ~25-fold; Fisher's exact test  $p=6.03 \times 10^{-80}$ ) (Figure 1g). To  
114 verify these results, we performed RT-qPCR on five selected CLE-containing genes:  
115 *nbeaa*, *gdf11*, *epha4b*, *trip4*, and *b4galt2*. In all cases, cryptic exons showed a substantial  
116 increase in expression level in *sfpq*<sup>-/-</sup> mutants compared to siblings (Figure S1c-g).  
117 Additionally, we detected a strong downregulation of the full-length isoforms in four of  
118 the five genes, suggesting that the loss of *sfpq* causes upregulation of the CLE isoforms at  
119 the expense of their normal counterparts (Figure S1d-g). These results argue that SFPQ  
120 is required to repress CLE splicing in order to maintain stable gene expression.

121

### 122 **CLEs tend to occur in long introns and show evidence of interspecies conservation**

123 In order to understand under what conditions CLEs form, we examined CLE-  
124 containing introns and compared them to all other introns from the same genes. We  
125 first asked where CLE-containing introns are found within their genes and found no bias

126 (Figure 2a). However, when we ranked the introns by length, we found that CLEs are  
127 frequently located in the longest intron of the gene (Figure 2b). CLE-containing introns  
128 are also significantly longer than the average intron size in the entire zebrafish  
129 transcriptome (Figure 2c). Consistent with these results, CLE-containing genes are  
130 significantly longer than average zebrafish genes (Figure S2). Within the intron, location  
131 of the CLE is biased toward the 5' end, with most appearing approximately 22.4% (95%  
132 confidence interval of 18.1% to 26.7%) of the way into the intron (Figure 2d). The  
133 distance between the CLE and the upstream exon is generally <10 kb (Figure 2e). We  
134 next asked whether the sequences within and neighboring these CLEs are conserved. To  
135 this end, we calculated the mean conservation scores of 1 kb sequences (sliding window,  
136 1 bp steps) along these CLE-containing introns, using the PhastCons analysis method  
137 (Siepel *et al*, 2005). Our analyses showed that sequences containing CLEs tend to have  
138 higher conservation scores as compared to sequences within the same intron that do not  
139 contain CLEs (Figure S2b). In fact, 18% of these sequences displayed a mean PhastCons  
140 score of at least 0.5 (as opposed to 12% of non-CLE sequences; Fisher's exact test:  $5.71 \times$   
141  $10^{-51}$ ) (Figure S2c). Next, we calculated the mean base conservation scores of each CLE  
142 together with 250 bp flanking sequences (Figure 2f and S2d). Although only 35% of the  
143 CLEs had a PhastCons score of at least 0.5, the sequences near its 3' acceptor site  
144 showed the highest conservation (Figure 2f). Together, these data indicate that CLEs are  
145 often found close to the 5' ends of very long introns and that at least some of these exons  
146 are evolutionarily conserved.

147

#### 148 **CLE-terminated transcripts are cleaved and polyadenylated at the 3' end**

149 Our data thus far suggests that these cryptic transcripts are stably expressed and  
150 detectable using RNA-seq and RT-qPCR techniques. Sequence analyses revealed that

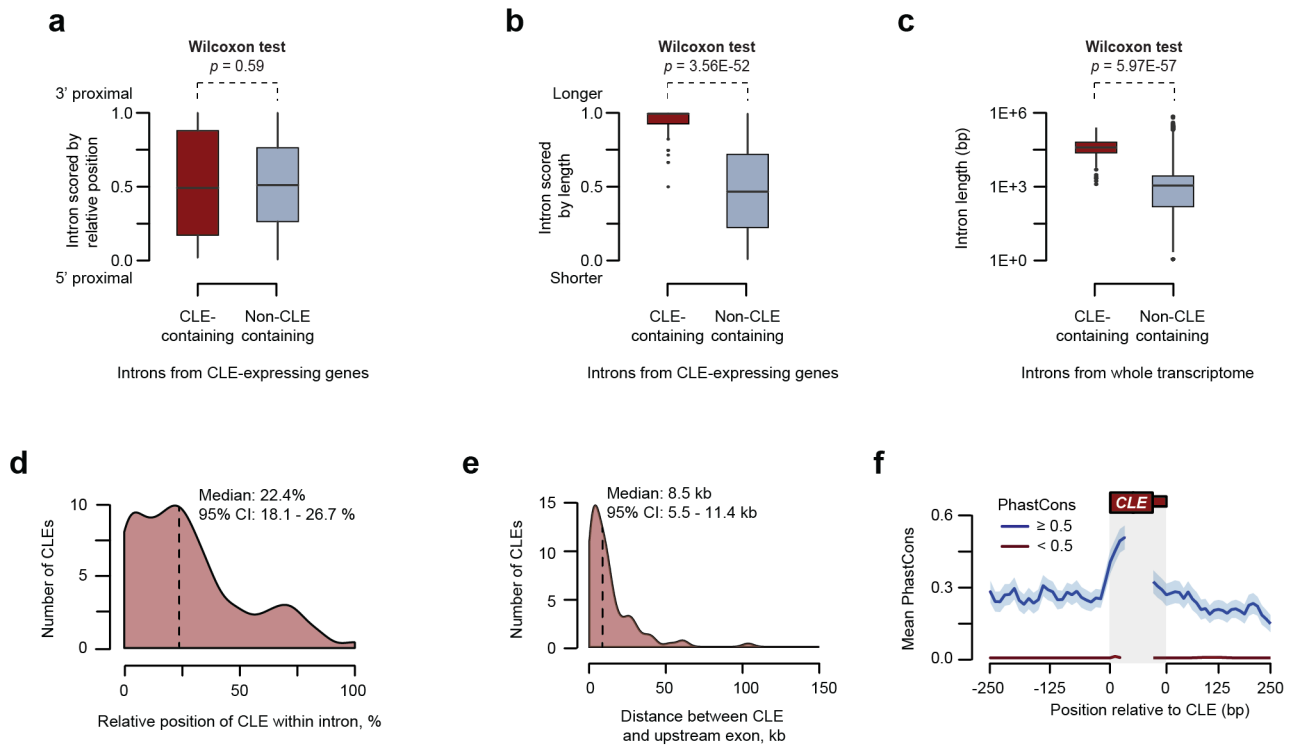

**Fig. 2 (a-f)**

**Figure 2 (a-f): Molecular properties of CLEs**

**a-b**, Introns from CLE-expressing genes were scored by its relative position (a) and by its relative length (b), and the distribution of these scores were plotted. Note that introns containing CLE tend to be long and sparsely distributed.

**c**, CLE-containing introns are longer than average introns. Length of CLE-containing introns is compared to all other introns from the zebrafish transcriptome.

**d**, CLEs tend to be found closer to the 5' end of its intron.

**e**, CLEs are found within 10 kb of the upstream constitutive exon.

**f**, Line-plot showing the conservation score of sequences surrounding conserved (blue) and non-conserved (red) CLEs. 280 bp of surrounding intron/CLE junction sequence (250 bp intron and 30bp exon) were binned into 10 bp windows and the mean PhastCons score for each bins were shown ( $\pm$  SEM).



**g**

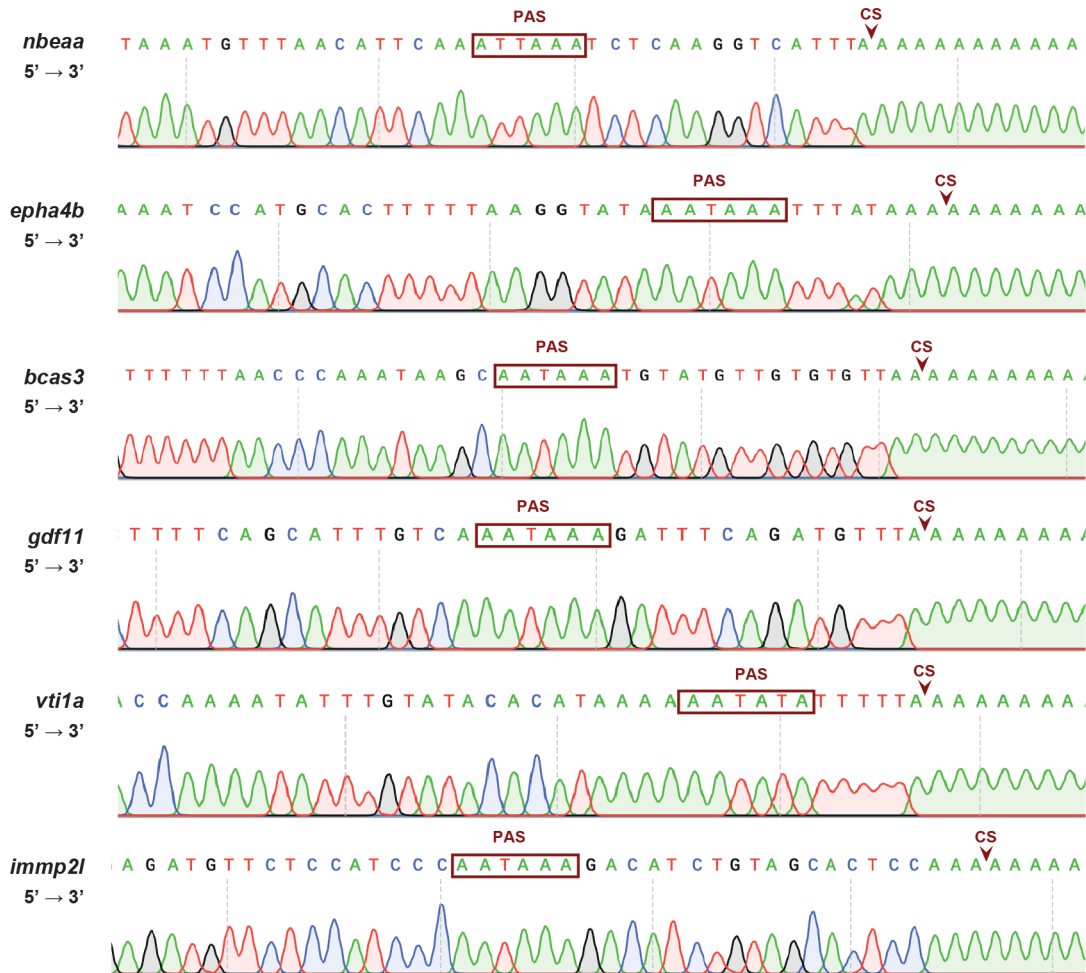

**Fig. 2 (g)**

**Figure 2 (g): Molecular properties of CLEs**

**g**, Sanger sequencing of 3'RACE PCR products of CLE isoforms. PAS hexamers are shown within red boxes and the predicted cleavage site are marked by arrowheads.

151 63% of these transcripts contain an open reading frame predicted to express truncated  
152 peptides with missing C-terminal domains (Table 6). To test if CLE transcripts are  
153 polyadenylated, we performed 3' RACE on six CLE-containing transcripts: *bcas3*, *epha4b*,  
154 *gdf11*, *immp2l*, *nbeaa*, and *vti1a*. We found that all six showed elements of strong  
155 polyadenylation sites (Shi & Manley, 2015): four of the six exons had canonical AAUAAA  
156 hexamers just upstream of the cleavage site, while the other two had common one-base  
157 substitutions of AUUAAA and AAUAUA. In addition, five of the six contained  
158 downstream GUGU sequences, while two also had an upstream UGUA. Although none of  
159 the exons had a canonical CA sequence directly 5' of the cleavage site, overall the cryptic  
160 exons displayed strong polyadenylation sequences.

161

### 162 **SFPQ directly binds to sequences adjacent to CLEs**

163 The accumulation of CLE-terminated transcripts in *sfpq* mutants raises the  
164 question of whether SFPQ represses CLEs in a direct manner. SFPQ binds promiscuously  
165 to a wide range of RNA sequences (Yarosh *et al*, 2015; Knott *et al*, 2016), making binding  
166 prediction difficult. Using a binding motif produced by a recent *in vitro* study (Ray *et al*,  
167 2013), however, we found a significant enrichment in predicted SFPQ binding sites  
168 upstream of cryptic exon sequences compared to control last exons (Figure 3a). To  
169 validate this, we purified SFPQ-RNA complexes in 24 hpf embryos using standard CLIP  
170 protocol and quantified the relative amount of bound CLE RNA fragments using RT-  
171 qPCR. Our results confirmed that SFPQ binds either within the CLE or in adjacent 5' or 3'  
172 intronic regions of at least three CLE transcripts (Figure 3b-d). These results support  
173 the idea that SFPQ directly binds to region surrounding CLEs to regulate their inclusion.

174

### 175 **CLEs can dampen the expression of full-length transcripts**

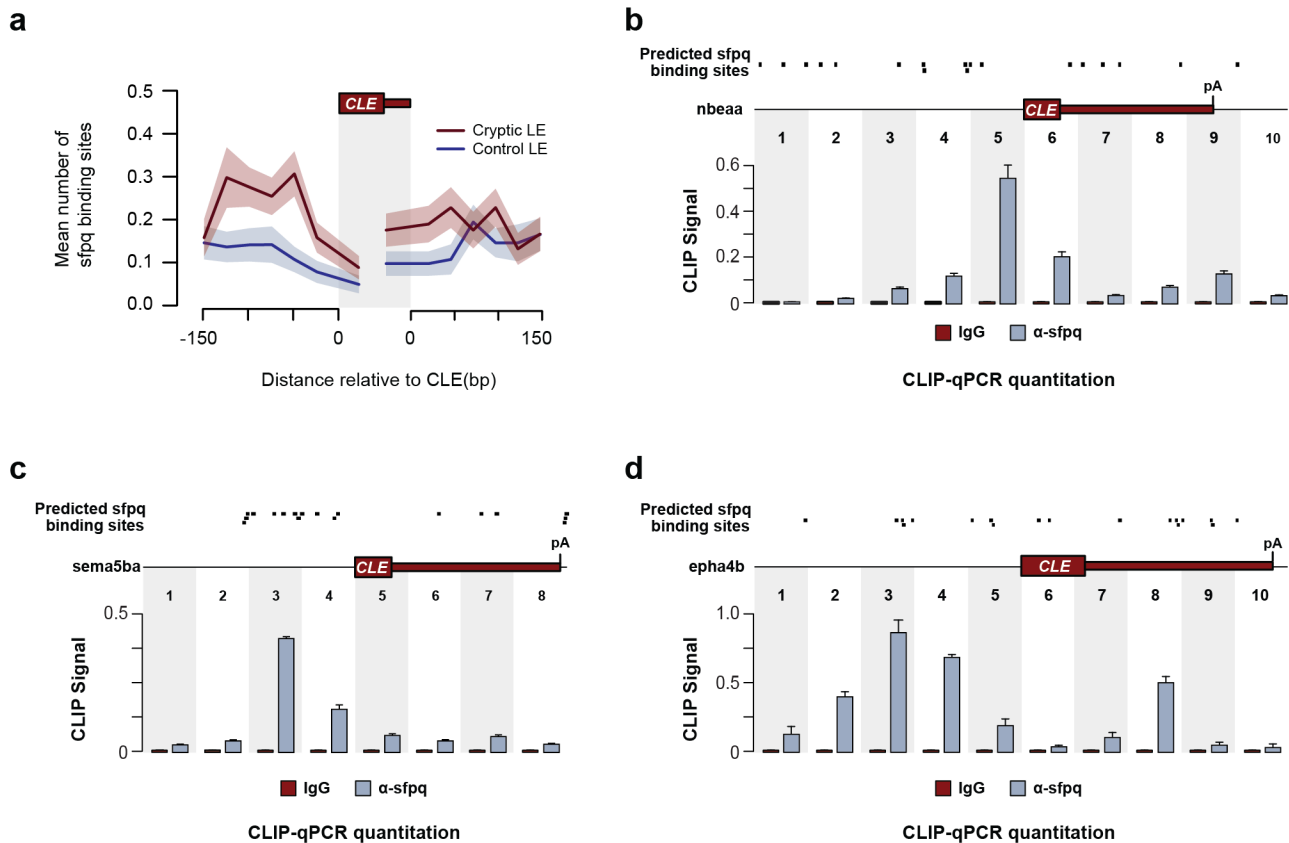

**Fig. 3**

**Figure 3: SFPQ directly binds to RNA adjacent to CLE sequences**

**a**, Line plot showing the distribution of predicted SFPQ-binding sites surrounding CLEs (red) and constitutive last exons of each CLE-containing gene (blue). 200 bp of surrounding intron/CLE junction sequence (150 bp intron and 50bp exon) were binned into 50 bp windows and the mean number of predicted motifs were shown ( $\pm$  SEM).

**b-d**, Top: Location of SFPQ binding motifs predicted using MEME suite. Bottom: RT-qPCR quantitation showing the relative enrichment of SFPQ-interacting regions surrounding CLEs. Abundance of SFPQ- or IgG(control)-crosslinked RNAs were normalized to input and the mean value from three replicates were shown ( $\pm$  SD).

176           The reciprocal relationship between CLEs and the abundance of full-length  
177 transcripts (Figure 1f) suggests that these exons may act as negative regulators of gene  
178 expression. If production of CLE transcripts is a mechanism for down-regulating the  
179 normal full-length transcripts, then eliminating the cryptic exon in *sfpq*<sup>-/-</sup> mutants  
180 should rescue their expression. To test this possibility, we used the gene *b4galt2* as case  
181 study, as it shows a very strong loss of expression of its three normal isoforms in the  
182 mutant (Figure S1f). We used CRISPR/Cas9 to delete the *b4galt2* CLE, injecting Cas9  
183 along with two guide RNAs that targeted directly upstream of the cryptic exon and at the  
184 3' end of the exon (Figure 4a). Injected founder embryos (crispants) will show  
185 mosaicism, so a complete loss of the cryptic exon would not be expected in every cell of  
186 the embryo. Despite mosaicism, PCR analysis of the “crispants” showed a strong  
187 deletion band for six out of eight tested embryos (Figure 4a). Encouraged by the high  
188 efficiency of the gRNAs, we performed RT-qPCR on pooled injected *sfpq*<sup>-/-</sup> embryos to  
189 measure the expression levels of the normal *b4galt2* transcripts and saw a significant  
190 rescue of the longer transcripts compared to the uninjected *sfpq*<sup>-/-</sup> control (Figure 4a).  
191 This result did not hold true with two other CLEs we deleted (example *gdf11* CLE, Figure  
192 S4a). We concluded that CLEs can regulate expression levels of at least some of the  
193 genes containing these exons.

194

195 **Truncated protein derived from CLE-containing *epha4b* transcripts accounts for**  
196 **the boundary defects in *sfpq*<sup>-/-</sup> brain**

197           In addition to affecting the expression levels of normal isoforms, CLE transcripts  
198 could impact the *sfpq* phenotype through aberrant functions of the truncated RNAs or  
199 the short peptides they produce. We focused on the candidate gene *epha4b*, which  
200 expresses a CLE-containing short mRNA in *sfpq* null embryos, while showing no change

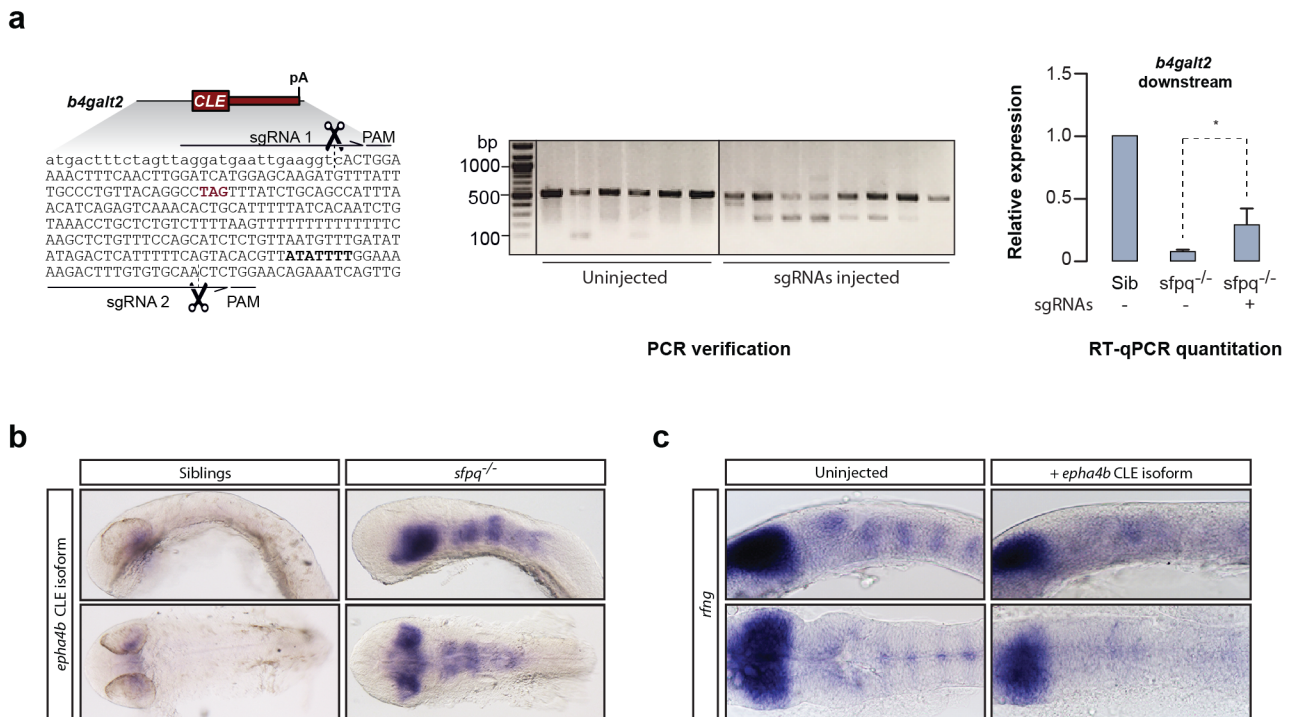

**Fig. 4 (a-c)**

**Figure 4 (a-c): CLE formation is functionally relevant**

**a**, Deletion of the *b4galt2* CLE using CRISPR/Cas9 rescues expression of downstream exons. Left: cut sites of the *b4galt2* sgRNAs. CLE is indicated by capital letters. Center: PCR verification of Cas9 cleavage after injection of sgRNAs. Right: RT-qPCR quantitation of the relative expression of the downstream *b4galt2* exons in *sfpq*<sup>-/-</sup> embryos compared to siblings.

**b**, in-situ hybridization of the *epha4b* CLE at 24 hpf, displaying strong expression in the midbrain and hindbrain of *sfpq*<sup>-/-</sup> embryos.

**c**, in-situ hybridization of *rfg* shows rhombomere boundary defects at 22ss after injection of the *epha4b* cryptic transcript into WT embryos

**b-d**, Upper: lateral view. Lower: dorsal view.

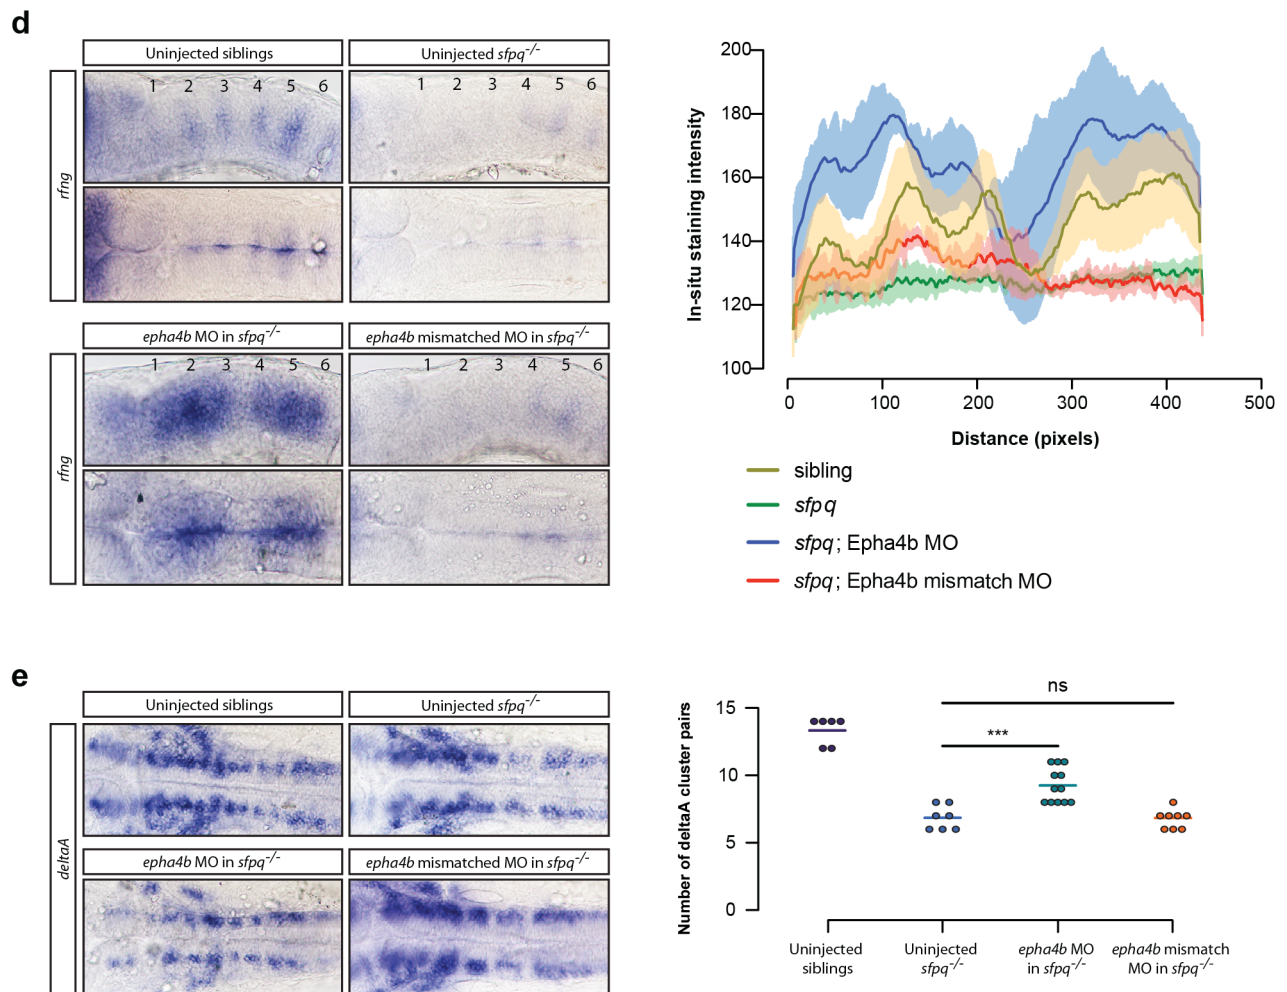

**Fig. 4 (d-e)**

**Figure 4 (d-e): CLE formation is functionally relevant**

**d**, Left: in-situ hybridization of *rfg* shows rhombomere boundary defects of *sfpq*<sup>-/-</sup> embryos are rescued by injection of the *epha4b* cryptic splice junction morpholino but not a mismatch morpholino. Rhombomere boundaries are numbered. Right: quantification of staining in rhombomeres in three lateral view samples for each condition

**e**, Left: in-situ hybridization of *DeltaA* shows a loss of discrete neuronal clusters in *sfpq*<sup>-/-</sup> which is rescued by injection of the *epha4b* cryptic splice junction morpholino but not a mismatch morpholino. Right: Quantification of number of *DeltaA* clusters in each condition.

**b-d**, Upper: lateral view. Lower: dorsal view.

201 in expression of the normal transcripts (Figure S1c). This gene is one of two zebrafish  
202 paralogues of the human ALS-associated gene *Epha4* (Van Hoecke *et al*, 2012; Wu *et al*,  
203 2017), coding for a protein-tyrosine kinase of the Ephrin receptor family known to  
204 regulate hindbrain boundary formation (Cooke *et al*, 2005; Kemp *et al*, 2009). Truncated  
205 forms of EPH receptors have been shown to act as dominant negatives by competing  
206 with full-length versions of the protein for ligand binding (Smith *et al*, 2004). The  
207 predicted peptide produced by the *epha4b* CLE-containing short transcript would  
208 contain the ligand binding domain but not the transmembrane and intracellular  
209 domains and thus would be predicted to be a dominant negative (Table S6).

210 To assess possible effects of the shortened *epha4b*, we first performed an *in-situ*  
211 hybridization using a probe for the cryptic exon. We found that in *sfpq*<sup>-/-</sup> embryos, but  
212 not in siblings, the *epha4b* CLE was expressed strongly in the midbrain and hindbrain  
213 (Figure 4b), where the gene is normally transcribed at that developmental stage. We  
214 then tested whether, in wildtype fish, injection of the CLE transcript would induce  
215 defects in the midbrain or hindbrain. Using the early hindbrain boundary marker *rfng*,  
216 we found that injection of the short *epha4b* transcript did not affect formation of the  
217 midbrain but did cause a loss of hindbrain rhombomere boundaries similar to that seen  
218 in the *sfpq*<sup>-/-</sup> mutant (Figure 4c).

219 We then asked whether repressing the *epha4b* CLE in *sfpq*<sup>-/-</sup> embryos could  
220 rescue the *sfpq* hindbrain defect. We used a splice junction morpholino (MO) that  
221 targeted the 3' splice acceptor site of the CLE to prevent the cryptic exon from being  
222 used in *sfpq* mutants. Although MOs frequently have off-target effects, those effects are  
223 generally the opposite of what we would expect to see from a rescue (i.e. increased cell  
224 death and off-target phenotypes, never rescue of phenotypes). However, as MOs have  
225 been shown to have some phenotypic effects on the hindbrain (Gerety & Wilkinson,

226 2011), we used mismatch controls to ensure that our results were specific to the *epha4b*  
227 CLE splice-MO. We tested the MO efficiency using RT-PCR with primers both within the  
228 cryptic exon and across the exon junction (Figure S4b). We then examined the effects of  
229 the MO on hindbrain development using both the boundary-specific *rfnq* marker (Figure  
230 4d) and the pan-neuronal marker DeltaA (Figure 4e). We saw that the CLE splice  
231 junction MO, but not the mismatch control, rescued formation of rhombomere  
232 boundaries in *sfpq*<sup>-/-</sup> mutants. Taken together, these results indicate that the hindbrain  
233 boundary defect in *sfpq*<sup>-/-</sup> embryos can be explained by the dominant-negative effects of  
234 the *epha4b* CLE transcript.

235

236 **Repression of CLEs by SFPQ is conserved across vertebrates and relevant to**  
237 **human neuropathologies.**

238 As our analysis of the *sfpq* loss-of-function phenotype was performed solely in  
239 zebrafish, we wondered whether SFPQ repressed CLEs in other organisms. Accordingly,  
240 we turned to publicly available RNA-seq datasets from *sfpq* loss-of-function  
241 experiments. A conditional mouse knock-out model (Takeuchi *et al*, 2018) inactivated  
242 *Sfpq* in the cerebral cortex. Examining mouse orthologs of zebrafish CLE-containing  
243 genes, we were able to identify CLE formation in mouse *Sfpq*-null brains for *Epha4b*,  
244 *Cpped1*, *Fam172a*, and *Exoc4* (Figure 5a and S5). Overall, we identified 144 instances of  
245 upregulation of CLEs in the cortical *Sfpq* knockout (Table S7). Examination of the CLE-  
246 containing introns showed results similar to those for the zebrafish CLEs: the CLE-  
247 containing introns have a bias towards appearing earlier in the gene, they are often  
248 embedded within the largest intron in a gene, and their host introns are significantly  
249 larger than the average mouse intron (Figure 5b).



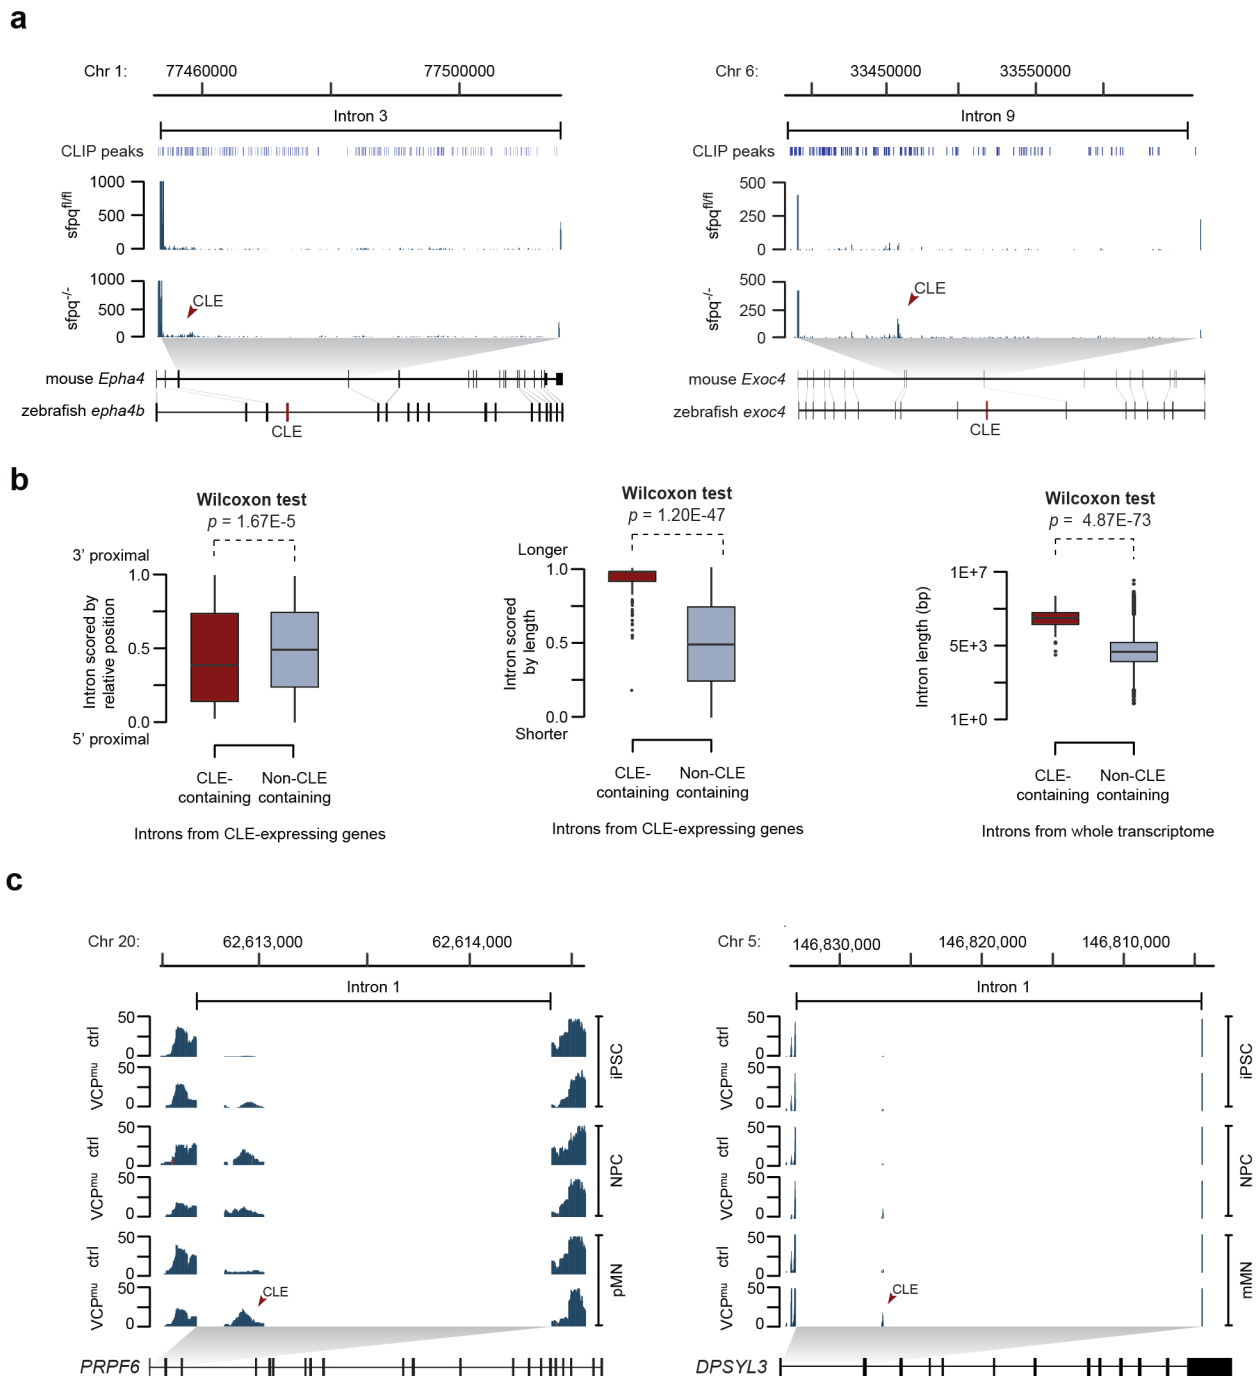

**Fig. 5**

**Figure 5: The CLE-repressing function of SFPQ is conserved in mouse and human**

**a**, Meta-analysis of RNA-seq and CLIP-seq dataset from conditional *Sfpq* knockout mice for cryptic last exons. Top: distribution of *Sfpq* CLIP peaks within the CLE-containing intron. Middle: tracks showing read coverage plots and “sashimi” plots from *Sfpq*<sup>fl/fl</sup> and *Sfpq*<sup>-/-</sup> mice. Bottom: exon architecture of orthologous CLE-expressing genes. Homologous regions between orthologues are shown as connecting lines.

**b**, Introns from mouse CLE-expressing genes were scored by its relative position (left) and by its relative length (mid), and the distribution of these scores were plotted. Note that introns containing CLE tend to be long and sparsely distributed. Right: CLE-containing introns are longer than average introns. Length of CLE-containing introns is compared to all other introns from the mouse transcriptome.

**c**, Representative RNA-seq coverage plots from ALS-derived iPSC dataset of CLEs up-regulated in VCP<sup>mu</sup> samples.

250 As SFPQ has been recently linked with ALS in human, we also examined RNA-seq  
251 results from iPSCs derived from ALS patients, which show loss of nuclear SFPQ  
252 expression (Luisier *et al*, 2018). In total, we found 76 CLE events up-regulated in ALS-  
253 mutant backgrounds across the neuronal differentiation stages (Table S8). This is  
254 probably an underestimation since the sequencing depth in this dataset was somewhat  
255 lower than that in the mouse knockout study. Interestingly, CLEs spliced from PRPF6  
256 and DPYSL3 genes showed consistent up-regulation in three time-points (Figure 5c).  
257 The latter gene is involved in positive regulation of axon guidance and genetic variants  
258 of this gene have been previously implicated in ALS patients (Blasco *et al*, 2013). These  
259 results indicate that CLE repression is a conserved function of SFPQ, and that CLE-  
260 dependent short transcripts may have a substantial impact on SFPQ-mediated disease  
261 states.

262

263

## 264 **Discussion**

265           Our study uncovers a critical role of SFPQ in repression of cryptic last exons  
266 (CLEs). We show that truncated transcripts appearing as a result of increased use of  
267 CLEs are functionally relevant both as regulators of gene expression output and as a  
268 source of interfering protein isoforms. Moreover, the CLE-repressing function of SFPQ is  
269 conserved in mouse and human, indicating an important developmental role, with  
270 implications for human pathology.

271

## 272 **Mechanism of CLE formation**

273           The presence of strong polyadenylation sites in CLE sequences suggests that the  
274 paucity of CLE-containing isoforms under normal physiological conditions is due to  
275 active suppression of CLE cleavage/polyadenylation or/and splicing. Our CLIP-seq  
276 experiments provide evidence for SFPQ binding within or directly adjacent to CLEs.  
277 Moreover, the bias of CLEs towards the 5' end of long introns is consistent with previous  
278 analyses of SFPQ localization on RNA (Takeuchi *et al*, 2018). These data argue that SFPQ  
279 may play a direct role in repressing cryptic exon formation. However, further work will  
280 be required to distinguish between suppression of splicing versus blocking of the  
281 polyadenylation site.

282           The relationship between SFPQ and CLEs extends our understanding of the  
283 regulation possibilities afforded by long introns. Indeed, long introns have been  
284 previously shown to control gene expression through interplay between premature  
285 cleavage/polyadenylation and the U1 snRNP-dependent antitermination mechanism  
286 known as "telescripting" (Langemeier *et al*, 2013; Oh *et al*, 2017; Venters *et al*, 2019;  
287 Kainov & Makeyev, 2020). SFPQ-mediated CLE repression also operates in long introns  
288 (Figure 2b) but, unlike telescripting, CLE involves definition of a last exon possibly via

289 interactions between the U2 snRNP and U2AF with the cleavage/polyadenylation  
290 machinery (Martinson, 2011). Moreover, inactivation of U1 often promotes  
291 cleavage/polyadenylation relatively close to the 5' end of the gene, whereas CLEs do not  
292 show such a gene location bias.

293 Long introns have been also shown to be subject to recursive splicing (RS), a  
294 multistep process promoting accuracy and efficiency of intron excision (Sibley *et al*,  
295 2015; Blazquez *et al*, 2018). Like CLEs, RS-sites appear primarily in long introns in  
296 genes with neuronal function. RS-sites initially produce an RS-exon that is spliced to the  
297 upstream exon prior to being excised at the subsequent round of splicing reactions.  
298 However, RS-exons do not contain polyadenylation sequences, so inclusion of the exon  
299 would not lead to truncation of the transcript. In addition, recursive splicing creates a  
300 stereotypical saw-tooth pattern of RNA-seq reads, which is not seen in the *sfpq*<sup>-/-</sup> RNA-  
301 seq data set. Therefore, SFPQ and CLEs provide a distinct regulation modality compared  
302 to telescripting and recursive splicing.

303

#### 304 **Pathology of cryptic transcripts**

305 A notable feature of the SFPQ-repressed CLEs is the detrimental effect that they  
306 have on the function of their host genes. We previously showed that loss of *sfpq* leads to  
307 an array of morphological and neurodevelopmental abnormalities in zebrafish embryos,  
308 including loss of brain boundaries and altered motor axon morphology (Thomas-Jinu *et*  
309 *al*, 2017). However, the mechanism by which those abnormalities formed was  
310 unresolved. Here, we found that CLEs contribute to at least one aspect of the *sfpq*  
311 phenotype: the dominant negative *epha4b* truncated transcript induces hindbrain  
312 boundary defects. Moreover, a subset of the identified CLE-dependent short transcripts  
313 identified in *sfpq*<sup>-/-</sup> is predicted to affect axon growth and connectivity.

314 While CLE formation is clearly detectable under pathological conditions of loss of  
315 *sfpq*, our data do not preclude the possibility of CLEs being expressed under non-  
316 pathological conditions. Although the CLEs are not annotated in the current zebrafish,  
317 mouse, and human genomes, it is possible that they may be regulated in a spatio-  
318 temporal manner such that they only appear in specific tissues and/or at specific  
319 developmental time points. Indeed, this possibility is supported by the relatively low  
320 expression of SFPQ in non-neuronal tissue (Thomas-Jinu *et al*, 2017; Lowery *et al*, 2007),  
321 and by low-level detection of the *epha4b* CLE transcript in siblings by PCR (Figure S4B).  
322 Early termination of long pre-mRNAs has been shown to be a developmentally  
323 controlled regulatory mechanism: the RNA-binding protein Sex-lethal promotes the  
324 formation of truncated transcripts during short nuclear cycles in *Drosophila* (Sandler *et*  
325 *al*, 2018), and downregulation of the cleavage and polyadenylation factor PCF11 during  
326 differentiation of mouse C2C12 myoblast cells suppresses intronic polyadenylation to  
327 promote long gene expression (Wang *et al*, 2019). Further examination of CLE  
328 expression in wildtype animals across development may identify possible role of these  
329 truncated transcripts in normal tissues.

330

### 331 **Cryptic exons in neurodegenerative disease**

332 Neurodegenerative diseases such as Alzheimer's, ALS, and FTD are frequently  
333 characterized by altered localization and function of splicing factors (Tyzack *et al*, 2019;  
334 Ling *et al*, 2013; Neumann *et al*, 2006; Nag *et al*, 2018). The ALS-associated proteins  
335 transactivation response element DNA-binding protein 43 (TDP-43) and fused in  
336 sarcoma (FUS) regulate alternative splicing and alternative polyadenylation (Ishigaki *et*  
337 *al*, 2012; Masuda *et al*, 2016; Deshaies *et al*, 2018; Melamed *et al*, 2019; Klim *et al*, 2019;  
338 Ling *et al*, 2015). TDP-43 has been shown to act as a repressor of cryptic exons, a

339 minority of which contain polyadenylation sites and thus would form CLEs (Ling *et al*,  
340 2015). Stathmin-2 is one of the latter and rescue of its normal full-length expression in  
341 TDP-43-knockdown cell culture improves axonal growth in this model (Melamed *et al*,  
342 2019; Klim *et al*, 2019), indicating that CLEs are pathogenic across various splicing  
343 protein-dependent pathologies. These findings place CLEs at the center of priority for  
344 understanding molecular mechanisms of neurodegenerative diseases and developing  
345 new ways to diagnose and treat these increasingly prevalent disorders.

346

347

348 **Acknowledgements:** This work was supported by the Biotechnology and Biological  
349 Sciences Research Council (BB/P001599/1 to CH BB/R001049/1 to E.V.M.); the European  
350 Commission (Project ID 734791; E.V.M); the Wellcome Trust (Tech Dev. WT093389 and  
351 Equipment WT094819 to CH) and EMBO (fellowship ALTF 1530-2015 to PMG). We  
352 thank Richard Poole for help with the TopHat pipeline.

353

## 354 **Materials and Methods**

### 355 *Zebrafish husbandry*

356 Zebrafish (*Danio rerio*) were reared in accordance with the Animals (Scientific  
357 Procedures) Act 1986. Fish were maintained on a 14 hr light/10 hr dark cycle at 28°C.  
358 Embryos were cultured in fish water containing 0.01% methylene blue to prevent fungal  
359 growth. Wildtype fish were AB strain from the Zebrafish International Resource Center  
360 (ZIRC), while *sfpq* null mutants were *sfpq*<sup>kg41</sup> (Thomas-Jinu *et al*, 2017).

361

### 362 *RNA-seq*

363 RNA was extracted from 24 hpf *sfpq*<sup>-/-</sup> embryos and their heterozygous or  
364 homozygous wildtype siblings using the RNeasy Mini Kit (Qiagen). RNA was sequenced  
365 using the Illumina HiSeq 2500 with 50bp paired-end reads.

366

### 367 *3' RACE*

368 RNA was extracted from 24 hpf *sfpq*<sup>-/-</sup> embryos using the RNeasy Mini Kit  
369 (Qiagen). Reverse transcription was performed using the 3' RACE System for Rapid  
370 Amplification of cDNA Ends (ThermoFisher). cDNA was amplified in two subsequent  
371 PCR reactions, using the adapter primer as a reverse primer and the following primers  
372 as forward primers:

373 *nbeaa*: AGAGAGGGACCGTGTAGAC, AAGGCACATCGAGCCCATATTG

374 *epha4b*: ATGGCAACCCTTTGGATTTATCCG, CTA CTGTCAGGCTGTTTCGG

375 *bcas3*: CGCTGCATGTCAGCTTCAC, CTCAGGAAACTGACAAACGCGAG

376 *gdf11*: GGGAGCATTATAGGCATCGGTAC, TGGCTTCAGAGCGAGTCATAG

377 *vti1a*: CGTCAATAAGAAGCAGACACAAGCAAC, GATTTTGTGGTCACATTTTCGTG

378 *immp2l*: CGACGCACAGCACGTACATAAG, GCGACATTGTGTCAGTTTTAACATC

379

### 380 *CLIP-qPCR*

381 Dechorionated 24 hpf wildtype fish were irradiated (twice at 0.8 J/cm<sup>2</sup>, 254nm)  
382 and deyolked using high calcium Ringer's solution (116 mM NaCl, 2.9 mM KCl, 10 mM  
383 CaCl<sub>2</sub>, 5 mM HEPES, pH 7.2) with 0.3 mM PMSF and 1 mM EDTA. After several washes,  
384 embryos were lysed using PXL buffer (0.1% SDS, 0.5% deoxycholate, 0.5% NP-40) and  
385 homogenized using a plastic pestle. Lysates were treated with 10 µL diluted RNaseI  
386 (1:500 dilution; Thermo Fisher) and 2 µL Turbo DNase (Thermo Fisher) at 37°C for 3  
387 minutes on a shaking incubator. Protein-RNA complexes were purified by centrifugation

388 and 5% of the lysate was retained as input. The remaining lysate were split into two and  
389 its volume were topped up to 100  $\mu$ L using PXL buffer. 100  $\mu$ L of protein A Dynabeads  
390 (Thermo Fisher) primed with either anti-SFPQ antibody (ab38148) or anti-IgG antibody  
391 (MA5-14453) were added to each lysate and incubated at 4°C for an hour on a rotator.  
392 Bound SFPQ-RNA complexes were purified and washed thrice in high salt wash buffer  
393 (50 mM Tris-HCL, pH 7.4, 1M NaCl, 1mM EDTA, 1% Igepal, 0.1% SDS, 0.5% sodium  
394 deoxycholate). Subsequently, bound complexes were washed twice in PNK wash buffer  
395 (20 mM Tris-HCL, pH 7.4, 10 mM MgCl<sub>2</sub>, 0.2% Tween-20) and followed by proteinase K  
396 digestion (Thermo Fisher). Bound RNAs were purified using phenol-chloroform  
397 extraction followed by reverse-transcription to generate cDNAs. Relative amounts of  
398 SFPQ-bound RNAs was quantified by qPCR using primers: (Table S9).

399

400

401 *CRISPR/Cas9*

402 gRNAs were formed from chemically synthesized Alt-R®-modified crRNAs from  
403 Integrated DNA Technologies (IDT). Each crRNA was suspended in duplex buffer to  
404 100 $\mu$ M concentration, then a crRNA:tracrRNA duplex was formed by combining 3 $\mu$ L  
405 crRNA, 3 $\mu$ L 100 $\mu$ M tracrRNA, and 19  $\mu$ L duplex buffer at 95°C for five minutes, then  
406 cooled to room temperature and stored at -20°C. To make gRNA:Cas9 RNP complexes, a  
407 mix was formed as follows: 1.5  $\mu$ L each gRNA, 0.75  $\mu$ L 2M KCl, 1.25  $\mu$ L EnGen Spy Cas9  
408 NLS (NEB). The mix was incubated at 37°C for five minutes, then brought to room  
409 temperature. One nanoliter of the gRNA:Cas9 complex was injected into embryos at the  
410 1-cell stage. The following gRNAs were used:

411 *b4galt2*: AAGGATGAATTGAAGGTCAC, AAAGACTTTGTGTGCAACTC

412 *gdf11*: GTAGAGAGTAGGTTTCAGAGT, GACCAAATGTTGTTAGAAAG



413

414 *RNA and morpholino injections*

415         The *epha4b* cryptic transcript was amplified from cDNA and inserted into the  
416 multi-cloning site of plasmid pCS2+ (Addgene). The *in-vitro* transcription reaction was  
417 performed on linearized plasmid using the mMessage mMachine SP6 Transcription Kit  
418 (ThermoFisher), and the RNA was purified using a Mini Quick Spin Column (Roche).  
419 100 pg RNA was injected into the embryo at the one-cell stage.

420         For morpholino knockdown of the *epha4b* cryptic exon, embryos were injected  
421 into the yolk at the one-cell stage with 0.1 pmol of Epha4b splice junction morpholino or  
422 mismatch.

423 Epha4b splice junction morpholino: ACAGCTGAGAAAAAACACGGATAT

424 Epha4b splice junction mismatch morpholino: ACACCTcAGAAAtAAAgACcGATAT

425

426 *In-situ hybridization*

427         Linearized plasmids containing the antisense sequence for *rfng* (Cheng *et al*,  
428 2004), *deltaA* (Allende & Weinberg, 1994), or the *epha4b* cryptic exon were transcribed  
429 into RNA probes using DIG labeling mix (Roche) according to the manufacturer's  
430 instructions. Probes were purified using Mini Quick Spin Columns (Roche). *In-situ*  
431 hybridization reaction was performed as described elsewhere (Thomas-Jinu & Houart,  
432 2013).

433

434 *qPCR*

435         RNA was extracted from 24-28 hpf *sfpq*<sup>-/-</sup> embryos and heterozygous or WT  
436 siblings using the RNease Mini Kit (Qiagen). 1 ug of extracted RNA was used in a reverse  
437 transcriptase reaction using the Superscript III First Strand cDNA Synthesis Kit

438 (Invitrogen). 250 ng of cDNA was used in qPCR reactions with the LightCycler 480 SYBR  
439 Green I Master Mix (Roche). Each sample was compared against a B-actin control  
440 reaction.

441

#### 442 *Bioinformatics*

443 For analyses of 24 hpf *sfpq*<sup>-/-</sup> RNA-seq data using Cufflinks package (Trapnell *et*  
444 *al*, 2012), reads were mapped to zebrafish GRCz9 assembly and differential expression  
445 analysis were carried out using default settings.

446

447 For analyses of 24 hpf *sfpq*<sup>-/-</sup> RNA-seq data using Whippet pipeline (Sterne-  
448 Weiler *et al*, 2018), a GRCz10 Ensembl-based index was generated using Whippet's  
449 index building function from the Ensembl-based fasta  
450 ([ftp://ftp.ensembl.org/pub/release-](ftp://ftp.ensembl.org/pub/release-91/fasta/danio_rerio/dna/Danio_rerio.GRCz10.dna.toplevel.fa.gz)  
451 [91/fasta/danio\\_rerio/dna/Danio\\_rerio.GRCz10.dna.toplevel.fa.gz](ftp://ftp.ensembl.org/pub/release-91/fasta/danio_rerio/dna/Danio_rerio.GRCz10.dna.toplevel.fa.gz)) and gene annotation  
452 files ([ftp://ftp.ensembl.org/pub/release-](ftp://ftp.ensembl.org/pub/release-91/gtf/danio_rerio/Danio_rerio.GRCz10.91.gtf.gz)  
453 [91/gtf/danio\\_rerio/Danio\\_rerio.GRCz10.91.gtf.gz](ftp://ftp.ensembl.org/pub/release-91/gtf/danio_rerio/Danio_rerio.GRCz10.91.gtf.gz)). Quantification of aligned RNA-seq  
454 reads were done as follows:

```
whippet - quant.jl fwd_file.fastq.gz rev_file.fastq.gz --biascorrect -x index_graph.jls  
-o < output_directory > --sam < SAM_output_directory >
```

455

456 The above quantification function outputs several tables containing read counts  
457 at the gene and isoform level. Differential gene and isoform expression analyses were  
458 identified using the edgeR package with the estimateGLMRobustDisp function  
459 (Robinson *et al*, 2010). Differential splicing events were identified using Whippet's delta  
460 analysis function with default parameters. An event with a "Probability" score exceeding

461 80% is classified as significantly regulated. Cryptic splicing events were annotated using  
462 custom R-scripts.

463

464 For analyses of conditional Sfpq knock-out mouse model (Takeuchi *et al*, 2018)  
465 dataset, the above Whippet pipeline was carried out using Ensembl's GRCm38 fasta  
466 ([ftp://ftp.ensembl.org/pub/release-](ftp://ftp.ensembl.org/pub/release-99/fasta/mus_musculus/dna/Mus_musculus.GRCm38.dna.toplevel.fa.gz)  
467 [99/fasta/mus\\_musculus/dna/Mus\\_musculus.GRCm38.dna.toplevel.fa.gz](ftp://ftp.ensembl.org/pub/release-99/fasta/mus_musculus/dna/Mus_musculus.GRCm38.dna.toplevel.fa.gz) ) and  
468 annotation ([ftp://ftp.ensembl.org/pub/release-](ftp://ftp.ensembl.org/pub/release-99/gtf/mus_musculus/Mus_musculus.GRCm38.99.gtf.gz)  
469 [99/gtf/mus\\_musculus/Mus\\_musculus.GRCm38.99.gtf.gz](ftp://ftp.ensembl.org/pub/release-99/gtf/mus_musculus/Mus_musculus.GRCm38.99.gtf.gz)) files. For analyses of  
470 conditional ALS-derived iPSC differentiation dataset (Luisier *et al*, 2018), the above  
471 Whippet pipeline was carried out using Ensembl's GRCh37 fasta  
472 ([ftp://ftp.ensembl.org/pub/grch37/current/fasta/homo\\_sapiens/dna/Homo\\_sapiens.G](ftp://ftp.ensembl.org/pub/grch37/current/fasta/homo_sapiens/dna/Homo_sapiens.GRCh37.dna.toplevel.fa.gz)  
473 [RCh37.dna.toplevel.fa.gz](ftp://ftp.ensembl.org/pub/grch37/current/fasta/homo_sapiens/dna/Homo_sapiens.GRCh37.dna.toplevel.fa.gz)) and annotation ([ftp://ftp.ensembl.org/pub/release-](ftp://ftp.ensembl.org/pub/release-75/gtf/homo_sapiens/Homo_sapiens.GRCh37.75.gtf.gz)  
474 [75/gtf/homo\\_sapiens/Homo\\_sapiens.GRCh37.75.gtf.gz](ftp://ftp.ensembl.org/pub/release-75/gtf/homo_sapiens/Homo_sapiens.GRCh37.75.gtf.gz)) files.

475

476 To construct CLE-containing transcripts, read alignments from Whippet were  
477 sorted , indexed and assembled using the StringTie program (Kovaka *et al*, 2019).  
478 Ensembl's GRCz10 transcriptome was used as reference and assembly was done for  
479 each biological replicate as follows:

```
stringtie < file1.bam > -p < num_threads > -o < file1.gtf > -G < reference >
```

480

481 Assembled transcripts from each sample were subsequently combined using  
482 StringTie's merge function using GRCz10 annotations as reference. CLE-containing  
483 isoforms were identified by intersecting exon coordinates from the merged transcript  
484 assembly with CLE coordinates from Whippet delta analysis output. Intersection

485 operation was done in R using Bioconductor's GenomicRanges package (Lawrence *et al*,  
486 2013). Analyses on the coding potential of CLE isoforms and its functional loss of  
487 protein domains were carried out using custom R-scripts.

488

489 For the analyses of introns from which the CLEs were spliced from, intronic  
490 features were extracted from the custom-assembled transcript in R using  
491 Bioconductor's GenomicFeatures package (Lawrence *et al*, 2013). A list of the largest,  
492 non-overlapping introns was generated and annotated for an overlap with a CLE  
493 segment using GenomicRanges' reduce and subsetByOverlaps functions respectively.  
494 The relative position of CLEs within its intron was determined using psetdiff operation  
495 followed by extracting the width of the upstream intronic segment.

496

497 For the analyses of CLE conservation, 8-way PhastCons data were downloaded  
498 from UCSC  
499 ([http://hgdownload.soe.ucsc.edu/goldenPath/danRer7/phastCons8way/fish.phastCons](http://hgdownload.soe.ucsc.edu/goldenPath/danRer7/phastCons8way/fish.phastCons8way.bw)  
500 [8way.bw](http://hgdownload.soe.ucsc.edu/goldenPath/danRer7/phastCons8way/fish.phastCons8way.bw)). Coordinates of CLE containing introns were converted to GRCv9 using UCSC's  
501 LiftOver function and binned into 1 kb sequence using a sliding window technique (1 bp  
502 steps). Average PhastCons score of each bin was calculated using bedtools' "map"  
503 function and bins containing CLE were annotated through intersection. Conservation  
504 scores of each CLE and 250 nt of its flanking introns were calculated using the same tool.  
505 To refine the conservation regions surrounding the intron-CLE borders, average  
506 PhastCons score were calculated for 10 nt windows including 30 nt of each exonic ends.

507

508 For the analyses of SFPQ binding motifs within sequences surrounding CLEs, its  
509 Position-Specific Scoring Matrix was downloaded from RBPmap

510 (<http://rbpmap.technion.ac.il/download.html>) and manually converted into a MEME  
511 motif format (<http://meme-suite.org/doc/meme-format.html>). Occurrence of SFPQ  
512 binding sites was analyzed using MEME's FIMO program ([http://meme-](http://meme-suite.org/doc/fimo.html)  
513 [suite.org/doc/fimo.html](http://meme-suite.org/doc/fimo.html)) using the following parameters:

```
fimo --thresh 0.005 --o < output_directory > < SFPQ_PSSM > < CLE_fasta >
```

514 The average number of SFPQ binding motifs were calculated for 25 nt windows of  
515 flanking intronic sequence including 25 nt of each exonic ends.

516

517

## 518 **References**

- 519 Allende ML & Weinberg ES (1994) The expression pattern of two zebrafish achaete-  
520 scute homolog (ash) genes is altered in the embryonic brain of the cyclops mutant.  
521 *Dev. Biol.* **166**: 509–530
- 522 Blasco H, Bernard-Marissal N, Vourc'h P, Guettard YO, Sunyach C, Augereau O,  
523 Khederchah J, Mouzat K, Antar C, Gordon PH, Veyrat-Durebex C, Besson G, Andersen  
524 PM, Salachas F, Meininger V, Camu W, Pettmann B, Andres CR & Corcia P (2013) A  
525 Rare Motor Neuron Deleterious Missense Mutation in the *DPYSL3* (*CRMP4*) Gene is  
526 Associated with ALS. *Hum. Mutat.* **34**: 953–960
- 527 Blazquez L, Emmett W, Faraway R, Pineda JMB, Bajew S, Gohr A, Haberman N, Sibley CR,  
528 Bradley RK, Irimia M & Ule J (2018) Exon Junction Complex Shapes the  
529 Transcriptome by Repressing Recursive Splicing. *Mol. Cell* **72**: 496-509.e9
- 530 Bottini S, Hamouda-Tekaya N, Mategot R, Zaragosi LE, Audebert S, Pisano S, Grandjean V,  
531 Mauduit C, Benahmed M, Barbry P, Repetto E & Trabucchi M (2017) Post-  
532 transcriptional gene silencing mediated by microRNAs is controlled by  
533 nucleoplasmic Sfpq. *Nat. Commun.* **8**: 1189
- 534 Cagnetta R, Frese CK, Shigeoka T, Krijgsveld J & Holt CE (2018) Rapid Cue-Specific  
535 Remodeling of the Nascent Axonal Proteome. *Neuron* **99**: 29-46.e4
- 536 Cheng Y-C, Amoyel M, Qiu X, Jiang Y-J, Xu Q & Wilkinson DG (2004) Notch Activation  
537 Regulates the Segregation and Differentiation of Rhombomere Boundary Cells in  
538 the Zebrafish Hindbrain. *Dev. Cell* **6**: 539–550
- 539 Ciolli Mattioli C, Rom A, Franke V, Imami K, Arrey G, Terne M, Woehler A, Akalin A,  
540 Ulitsky I & Chekulaeva M (2019) Alternative 3' UTRs direct localization of  
541 functionally diverse protein isoforms in neuronal compartments. *Nucleic Acids Res.*  
542 **47**: 2560–2573
- 543 Cooke JE, Kemp HA & Moens CB (2005) EphA4 Is Required for Cell Adhesion and  
544 Rhombomere-Boundary Formation in the Zebrafish. *Curr. Biol.* **15**: 536–542
- 545 Cosker KE, Fenstermacher SJ, Pazyra-Murphy MF, Elliott HL & Segal RA (2016) The RNA-  
546 binding protein SFPQ orchestrates an RNA regulon to promote axon viability. *Nat.*  
547 *Neurosci.* **19**: 690–696

- 548 Deshaies J-E, Shkreta L, Moszczynski AJ, Sidibé H, Semmler S, Fouillen A, Bennett ER,  
549 Bekenstein U, Destroismaisons L, Toutant J, Delmotte Q, Volkening K, Stabile S,  
550 Aulas A, Khalfallah Y, Soreq H, Nanci A, Strong MJ, Chabot B & Vande Velde C (2018)  
551 TDP-43 regulates the alternative splicing of hnRNP A1 to yield an aggregation-  
552 prone variant in amyotrophic lateral sclerosis. *Brain* **141**: 1320–1333
- 553 Dye BT & Patton JG (2001) An RNA recognition motif (RRM) is required for the  
554 localization of PTB-associated splicing factor (PSF) to subnuclear speckles. *Exp. Cell*  
555 *Res.* **263**: 131–144
- 556 Furlanis E, Traunmüller L, Fucile G & Scheiffele P (2019) Landscape of ribosome-  
557 engaged transcript isoforms reveals extensive neuronal-cell-class-specific  
558 alternative splicing programs. *Nat. Neurosci.* **22**: 1709–1717
- 559 Gerety SS & Wilkinson DG (2011) Morpholino artifacts provide pitfalls and reveal a  
560 novel role for pro-apoptotic genes in hindbrain boundary development. *Dev. Biol.*  
561 **350**: 279–289
- 562 Guvenek A & Tian B (2018) Analysis of alternative cleavage and polyadenylation in  
563 mature and differentiating neurons using RNA-seq data. *Quant. Biol.* **6**: 253–266
- 564 Hall-Pogar T, Liang S, Hague LK & Lutz CS (2007) Specific trans-acting proteins interact  
565 with auxiliary RNA polyadenylation elements in the COX-2 3'-UTR. *RNA* **13**: 1103–  
566 1115
- 567 Hanus C & Schuman EM (2013) Proteostasis in complex dendrites. *Nat. Rev. Neurosci.*  
568 **14**: 638–648
- 569 Heyd F & Lynch KW (2010) Phosphorylation-dependent regulation of PSF by GSK3  
570 controls CD45 alternative splicing. *Mol. Cell* **40**: 126–137
- 571 Van Hoecke A, Schoonaert L, Lemmens R, Timmers M, Staats KA, Laird AS, Peeters E,  
572 Philips T, Goris A, Dubois B, Andersen PM, Al-Chalabi A, Thijs V, Turnley AM, van  
573 Vught PW, Veldink JH, Hardiman O, Van Den Bosch L, Gonzalez-Perez P, Van Damme  
574 P, et al (2012) EPHA4 is a disease modifier of amyotrophic lateral sclerosis in  
575 animal models and in humans. *Nat. Med.* **18**: 1418–1422
- 576 Holt CE & Schuman EM (2013) The central dogma decentralized: New perspectives on  
577 RNA function and local translation in neurons. *Neuron* **80**: 648–657
- 578 Iijima Y, Tanaka M, Suzuki S, Hauser D, Tanaka M, Okada C, Ito M, Ayukawa N, Sato Y,  
579 Ohtsuka M, Scheiffele P & Iijima T (2019) SAM68-specific splicing is required for  
580 proper selection of alternative 3'UTR isoforms in the nervous system. *SCIENCE*
- 581 Ishigaki S, Fujioka Y, Okada Y, Riku Y, Udagawa T, Honda D, Yokoi S, Endo K, Ikenaka K,  
582 Takagi S, Iguchi Y, Sahara N, Takashima A, Okano H, Yoshida M, Warita H, Aoki M,  
583 Watanabe H, Okado H, Katsuno M, et al (2017) Altered Tau Isoform Ratio Caused by  
584 Loss of FUS and SFPQ Function Leads to FTL-like Phenotypes. *Cell Rep.* **18**: 1118–  
585 1131
- 586 Ishigaki S, Masuda A, Fujioka Y, Iguchi Y, Katsuno M, Shibata A, Urano F, Sobue G & Ohno  
587 K (2012) Position-dependent FUS-RNA interactions regulate alternative splicing  
588 events and transcriptions. *Sci. Rep.* **2**:
- 589 Kainov YA & Makeyev E V. (2020) A transcriptome-wide antitermination mechanism  
590 sustaining identity of embryonic stem cells. *Nat. Commun.* **11**: 1–18
- 591 Ke Y, Dramiga J, Schütz U, Kril JJ, Ittner LM, Schröder H & Götz J (2012) Tau-mediated  
592 nuclear depletion and cytoplasmic accumulation of SFPQ in Alzheimer's and Pick's  
593 disease. *PLoS One* **7**:
- 594 Kemp HA, Cooke JE & Moens CB (2009) EphA4 and EfnB2a maintain rhombomere  
595 coherence by independently regulating intercalation of progenitor cells in the  
596 zebrafish neural keel. *Dev. Biol.* **327**: 313–326

- 597 Kim KK, Kim YC, Adelstein RS & Kawamoto S (2011) Fox-3 and PSF interact to activate  
598 neural cell-specific alternative splicing. *Nucleic Acids Res.* **39**: 3064–3078
- 599 Klim JR, Williams LA, Limone F, Guerra San Juan I, Davis-Dusenbery BN, Mordes DA,  
600 Burberry A, Steinbaugh MJ, Gamage KK, Kirchner R, Moccia R, Cassel SH, Chen K,  
601 Wainger BJ, Woolf CJ & Eggan K (2019) ALS-implicated protein TDP-43 sustains  
602 levels of STMN2, a mediator of motor neuron growth and repair. *Nat. Neurosci.* **22**:  
603 167–179
- 604 Knott GJ, Bond CS & Fox AH (2016) The DBHS proteins SFPQ, NONO and PSPC1: A  
605 multipurpose molecular scaffold. *Nucleic Acids Res.* **44**: 3989–4004
- 606 Kovaka S, Zimin A V., Pertea GM, Razaghi R, Salzberg SL & Pertea M (2019)  
607 Transcriptome assembly from long-read RNA-seq alignments with StringTie2.  
608 *Genome Biol.* **20**: 278
- 609 Langemeier J, Radtke M & Bohne J (2013) U1 snRNP-mediated poly(A) site suppression:  
610 Beneficial and deleterious for mRNA fate. *RNA Biol.* **10**: 180–184
- 611 Lawrence M, Huber W, Pagès H, Aboyoun P, Carlson M, Gentleman R, Morgan MT &  
612 Carey VJ (2013) Software for Computing and Annotating Genomic Ranges. *PLoS*  
613 *Comput. Biol.* **9**: e1003118
- 614 Ling JP, Pletnikova O, Troncoso JC & Wong PC (2015) TDP-43 repression of  
615 nonconserved cryptic exons is compromised in ALS-FTD. *Science (80-. ).* **349**: 650–  
616 655
- 617 Ling S-C, Polymenidou M & Cleveland DW (2013) Converging Mechanisms in ALS and  
618 FTD: Disrupted RNA and Protein Homeostasis. *Neuron* **79**: 416–438
- 619 Lowery LA, Rubin J & Sive H (2007) whitesnake/sfpq is required for cell survival and  
620 neuronal development in the zebrafish. *Dev. Dyn.* **236**: 1347–1357
- 621 Lu J, Shu R & Zhu Y (2018) Dysregulation and Dislocation of SFPQ Disturbed DNA  
622 Organization in Alzheimer’s Disease and Frontotemporal Dementia. *J. Alzheimer’s*  
623 *Dis.* **61**: 1311–1321
- 624 Luisier R, Tyzack GE, Hall CE, Mitchell JS, Devine H, Taha DM, Malik B, Meyer I,  
625 Greensmith L, Newcombe J, Ule J, Luscombe NM & Patani R (2018) Intron retention  
626 and nuclear loss of SFPQ are molecular hallmarks of ALS. *Nat. Commun.* **9**: 2010
- 627 Martinson HG (2011) An active role for splicing in 3’-end formation. *Wiley Interdiscip.*  
628 *Rev. RNA* **2**: 459–470
- 629 Masuda A, Takeda J & Ohno K (2016) FUS-mediated regulation of alternative RNA  
630 processing in neurons: insights from global transcriptome analysis. *Wiley*  
631 *Interdiscip. Rev. RNA* **7**: 330–340
- 632 Mauger O, Lemoine F & Scheiffele P (2016) Targeted Intron Retention and Excision for  
633 Rapid Gene Regulation in Response to Neuronal Activity. *Neuron* **92**: 1266–1278
- 634 Melamed Z, López-Erauskin J, Baughn MW, Zhang O, Drenner K, Sun Y, Freyermuth F,  
635 McMahan MA, Beccari MS, Artates JW, Ohkubo T, Rodriguez M, Lin N, Wu D, Bennett  
636 CF, Rigo F, Da Cruz S, Ravits J, Lagier-Tourenne C & Cleveland DW (2019)  
637 Premature polyadenylation-mediated loss of stathmin-2 is a hallmark of TDP-43-  
638 dependent neurodegeneration. *Nat. Neurosci.* **22**: 180–190
- 639 Mora Gallardo C, Sánchez de Diego A, Gutiérrez Hernández J, Talavera-Gutiérrez A,  
640 Fischer T, Martínez-A C & van Wely KHM (2019) Dido3-dependent SFPQ  
641 recruitment maintains efficiency in mammalian alternative splicing. *Nucleic Acids*  
642 *Res.*: 1–14
- 643 Nag S, Yu L, Boyle PA, Leurgans SE, Bennett DA & Schneider JA (2018) TDP-43 pathology  
644 in anterior temporal pole cortex in aging and Alzheimer’s disease. *Acta Neuropathol.*  
645 *Commun.* **6**: 33

- 646 Neumann M, Sampathu DM, Kwong LK, Truax AC, Micsenyi MC, Chou TT, Bruce J, Schuck  
647 T, Grossman M, Clark CM, McCluskey LF, Miller BL, Masliah E, Mackenzie IR,  
648 Feldman H, Feiden W, Kretzschmar HA, Trojanowski JQ & Lee VM-Y (2006)  
649 Ubiquitinated TDP-43 in Frontotemporal Lobar Degeneration and Amyotrophic  
650 Lateral Sclerosis. *Science (80-. )*. **314**: 130–133
- 651 Oh JM, Di C, Venters CC, Guo J, Arai C, So BR, Pinto AM, Zhang Z, Wan L, Younis I &  
652 Dreyfuss G (2017) U1 snRNP telescripting regulates a size-function-stratified  
653 human genome. *Nat. Struct. Mol. Biol.* **24**: 993–999
- 654 Patton JG, Porro EB, Galceran J, Tempst P & Nadal-Ginard B (1993) Cloning and  
655 characterization of PSF, a novel pre-mRNA splicing factor. *Genes Dev.* **7**: 393–406
- 656 Ray D, Kazan H, Cook KB, Weirauch MT, Najafabadi HS, Li X, Gueroussov S, Albu M,  
657 Zheng H, Yang A, Na H, Irimia M, Matzat LH, Dale RK, Smith SA, Yarosh CA, Kelly SM,  
658 Nabet B, Mecnas D, Li W, et al (2013) A compendium of RNA-binding motifs for  
659 decoding gene regulation. *Nature* **499**: 172–177
- 660 Ray P, Kar A, Fushimi K, Havlioglu N, Chen X & Wu JY (2011) PSF suppresses tau exon 10  
661 inclusion by interacting with a stem-loop structure downstream of exon 10. In  
662 *Journal of Molecular Neuroscience* pp 453–466. Humana Press Inc
- 663 Robinson MD, McCarthy DJ & Smyth GK (2010) edgeR: a Bioconductor package for  
664 differential expression analysis of digital gene expression data. *Bioinformatics* **26**:  
665 139–140
- 666 Rosonina E, Ip JYY, Calarco JA, Bakowski MA, Emili A, McCracken S, Tucker P, Ingles CJ &  
667 Blencowe BJ (2005) Role for PSF in Mediating Transcriptional Activator-Dependent  
668 Stimulation of Pre-mRNA Processing In Vivo. *Mol. Cell. Biol.* **25**: 6734–6746
- 669 Sandler JE, Irizarry J, Stepanik V, Dunipace L, Amrhein H & Stathopoulos A (2018) A  
670 Developmental Program Truncates Long Transcripts to Temporally Regulate Cell  
671 Signaling. *Dev. Cell* **47**: 773-784.e6
- 672 Saud K, Cánovas J, Lopez CI, Berndt FA, López E, Maass JC, Barriga A & Kukuljan M  
673 (2017) SFPQ associates to LSD1 and regulates the migration of newborn pyramidal  
674 neurons in the developing cerebral cortex. *Int. J. Dev. Neurosci.* **57**: 1–11
- 675 Shi Y, Di Giammartino DC, Taylor D, Sarkeshik A, Rice WJ, Yates JR, Frank J & Manley JL  
676 (2009) Molecular Architecture of the Human Pre-mRNA 3' Processing Complex.  
677 *Mol. Cell* **33**: 365–376
- 678 Shi Y & Manley JL (2015) The end of the message: Multiple protein–RNA interactions  
679 define the mRNA polyadenylation site. *Genes Dev.* **29**: 889–897
- 680 Sibley CR, Emmett W, Blazquez L, Faro A, Haberman N, Briese M, Trabzuni D, Ryten M,  
681 Weale ME, Hardy J, Modic M, Curk T, Wilson SW, Plagnol V & Ule J (2015) Recursive  
682 splicing in long vertebrate genes. *Nature* **521**: 371–375
- 683 Siepel A, Bejerano G, Pedersen JS, Hinrichs AS, Hou M, Rosenbloom K, Clawson H, Spieth  
684 J, Hillier LDW, Richards S, Weinstock GM, Wilson RK, Gibbs RA, Kent WJ, Miller W &  
685 Haussler D (2005) Evolutionarily conserved elements in vertebrate, insect, worm,  
686 and yeast genomes. *Genome Res.* **15**: 1034–1050
- 687 Smith A, Robinson V, Patel K & Wilkinson DG (2004) The EphA4 and EphB1 receptor  
688 tyrosine kinases and ephrin-B2 ligand regulate targeted migration of branchial  
689 neural crest cells. *Curr. Biol.* **7**: 561–570
- 690 Sterne-Weiler T, Weatheritt RJ, Best AJ, Ha KCH & Blencowe BJ (2018) Efficient and  
691 Accurate Quantitative Profiling of Alternative Splicing Patterns of Any Complexity  
692 on a Laptop. *Mol. Cell* **72**: 187-200.e6
- 693 Takeuchi A, Iida K, Tsubota T, Hosokawa M, Denawa M, Brown JB, Ninomiya K, Ito M,  
694 Kimura H, Abe T, Kiyonari H, Ohno K & Hagiwara M (2018) Loss of Sfpq Causes



- 695 Long-Gene Transcriptopathy in the Brain. *Cell Rep.* **23**: 1326–1341
- 696 Taliaferro JM, Vidaki M, Oliveira R, Olson S, Zhan L, Saxena T, Wang ET, Graveley BR,  
697 Gertler FB, Swanson MS & Burge CB (2016) Distal Alternative Last Exons Localize  
698 mRNAs to Neural Projections. *Mol. Cell* **61**: 821–833
- 699 Thomas-Jinu S, Gordon PM, Fielding T, Taylor R, Smith BN, Snowden V, Blanc E, Vance C,  
700 Topp S, Wong CH, Bielen H, Williams KL, McCann EP, Nicholson GA, Pan-Vazquez A,  
701 Fox AH, Bond CS, Talbot WS, Blair IP, Shaw CE, et al (2017) Non-nuclear Pool of  
702 Splicing Factor SFPQ Regulates Axonal Transcripts Required for Normal Motor  
703 Development. *Neuron* **94**: 322–336.e5
- 704 Thomas-Jinu S & Houart C (2013) Dynamic expression of neuorexophilin1 during  
705 zebrafish embryonic development. *Gene Expr. Patterns* **13**: 395–401
- 706 Trapnell C, Roberts A, Goff L, Pertea G, Kim D, Kelley DR, Pimentel H, Salzberg SL, Rinn JL  
707 & Pachter L (2012) Differential gene and transcript expression analysis of RNA-seq  
708 experiments with TopHat and Cufflinks. *Nat. Protoc.* **7**: 562–578
- 709 Traunmüller L, Gomez AM, Nguyen TM & Scheiffle P (2016) Control of neuronal  
710 synapse specification by a highly dedicated alternative splicing program. *Science*  
711 *(80- )*. **352**: 982–986
- 712 Tushev G, Glock C, Heumüller M, Biever A, Jovanovic M & Schuman EM (2018)  
713 Alternative 3' UTRs Modify the Localization, Regulatory Potential, Stability, and  
714 Plasticity of mRNAs in Neuronal Compartments. *Neuron* **98**: 495–511.e6
- 715 Tyzack GE, Luisier R, Taha DM, Neeves J, Modic M, Mitchell JS, Meyer I, Greensmith L,  
716 Newcombe J, Ule J, Luscombe NM & Patani R (2019) Widespread FUS  
717 mislocalization is a molecular hallmark of amyotrophic lateral sclerosis. *Brain*
- 718 Venters CC, Oh J-M, Di C, So BR & Dreyfuss G (2019) U1 snRNP Telescripting:  
719 Suppression of Premature Transcription Termination in Introns as a New Layer of  
720 Gene Regulation. *cshperspectives.cshlp.org* **11**: a032235
- 721 Wang G, Yang H, Yan S, Wang C-E, Liu X, Zhao B, Ouyang Z, Yin P, Liu Z, Zhao Y, Liu T, Fan  
722 N, Guo L, Li S, Li X-J & Lai L (2015) Cytoplasmic mislocalization of RNA splicing  
723 factors and aberrant neuronal gene splicing in TDP-43 transgenic pig brain. *Mol.*  
724 *Neurodegener.* **10**: 42
- 725 Wang R, Zheng D, Wei L, Ding Q & Tian B (2019) Regulation of Intronic Polyadenylation  
726 by PCF11 Impacts mRNA Expression of Long Genes. *Cell Rep.* **26**: 2766–2778.e6
- 727 Wu B, De SK, Kulinich A, Salem AF, Koeppe J, Wang R, Barile E, Wang S, Zhang D, Ethell I  
728 & Pellecchia M (2017) Potent and Selective EphA4 Agonists for the Treatment of  
729 ALS. *Cell Chem. Biol.* **24**: 293–305
- 730 Yarosh CA, Tapescu I, Thompson MG, Qiu J, Mallory MJ, Fu XD & Lynch KW (2015)  
731 TRAP150 interacts with the RNA-binding domain of PSF and antagonizes splicing of  
732 numerous PSF-target genes in T cells. *Nucleic Acids Res.* **43**: 9006–9016
- 733 Zappulo A, Van Den Bruck D, Ciolli Mattioli C, Franke V, Imami K, McShane E, Moreno-  
734 Estelles M, Calviello L, Filipchuk A, Peguero-Sanchez E, Müller T, Woehler A,  
735 Birchmeier C, Merino E, Rajewsky N, Ohler U, Mazzoni EO, Selbach M, Akalin A &  
736 Chekulaeva M (2017) RNA localization is a key determinant of neurite-enriched  
737 proteome. *Nat. Commun.* **8**:  
738
